# Supplementary material for: Classification Performance of Machine Learning Methods for Identifying Resistance, Resilience, and Susceptibility to Haemonchus contortus Infections in Sheep
Source: MDPI journal article supplement (doi:10.3390/ani13030374), 2023-01-21
Supplement: s1 [file s1]

## Supplementary Materials

**Table S1.** Number of records for each farm and each class of the parasitic infection (resistant, resilient and susceptible).

| Class of the parasitic<br>infection | Farm |     |     |    |     |     |
|-------------------------------------|------|-----|-----|----|-----|-----|
|                                     | A    | B   | C   | D  | E   | F   |
| Resistant                           | 397  | 301 | 322 | 57 | 684 | 844 |
| Resilient                           | 243  | 128 | 145 | 42 | 110 | 271 |
| Susceptible                         | 28   | 5   | 19  | 7  | 4   | 47  |
